# Supplementary material for: Flowering Time Diversification and Dispersal in Central Eurasian Wild Wheat Aegilops tauschii Coss.: Genealogical and Ecological Framework
Source: PubMed Central journal article supplement (PMC2519791; doi:10.1371/journal.pone.0003138), 2008-09-04
Supplement: pone.0003138.s001.pdf [file pone.0003138.s001.pdf]

**Table S1.** *Ae. tauschii* accessions and their geographic, phenotypic, genetic and palaeoclimatic properties

| No. | Accession | Latitude | Longitude | Flowering time<br>(day) | Haplogroup <sup>1)</sup> | Haplotype <sup>2)</sup> | Vegetation at the Last Glacial<br>Maximum <sup>3)</sup> | Mean temperature of<br>coldest quarter (°C) <sup>4)</sup> | Annual precipitation<br>(mm) <sup>4)</sup> |
|-----|-----------|----------|-----------|-------------------------|--------------------------|-------------------------|---------------------------------------------------------|-----------------------------------------------------------|--------------------------------------------|
| 1   | AE 454    | 41.89472 | 44.80194  | 172.7                   | HG17                     | -                       | Temperate desert vegetation                             | 0.1500                                                    | 704.0000                                   |
| 2   | AE 457    | 41.63528 | 44.89500  | 180.0                   | HG17                     | -                       | Temperate desert vegetation                             | 2.7000                                                    | 511.0000                                   |
| 3   | AE 929    | 41.89472 | 44.80194  | 173.0                   | HG17                     | -                       | Temperate desert vegetation                             | 0.1500                                                    | 704.0000                                   |
| 4   | AE 933    | 41.84583 | 44.79167  | 163.3                   | HG7                      | HT7-7                   | Temperate desert vegetation                             | -0.4500                                                   | 742.0000                                   |
| 5   | AE 1037   | 41.71389 | 44.35417  | 166.7                   | HG7                      | HT7-11                  | Temperate desert vegetation                             | -3.0333                                                   | 792.0000                                   |
| 6   | AE 1038   | 37.33528 | 68.29778  | 144.0                   | HG7                      | HT7-15                  | Temperate desert vegetation                             | 4.2667                                                    | 293.0000                                   |
| 7   | AE 1090   | 42.09750 | 69.53361  | 153.0                   | HG16                     | HT16D                   | Temperate desert vegetation                             | -0.4167                                                   | 529.0000                                   |
| 8   | CGN 10767 | 30.41667 | 66.96667  | 151.0                   | HG13                     | -                       | Tropiacal semi-desert vegetation                        | 5.8000                                                    | 255.0000                                   |
| 9   | CGN 10768 | 30.38333 | 67.00000  | 150.0                   | HG16                     | HT16K                   | Tropiacal semi-desert vegetation                        | 5.6333                                                    | 256.0000                                   |
| 10  | CGN 10769 | 30.55250 | 66.87917  | 150.7                   | HG16                     | HT16J                   | Tropiacal semi-desert vegetation                        | 6.3833                                                    | 251.0000                                   |
| 11  | CGN 10770 | 30.24944 | 67.02944  | 150.0                   | HG16                     | HT16J                   | Tropiacal semi-desert vegetation                        | 5.2167                                                    | 248.0000                                   |
| 12  | CGN 10771 | 30.22028 | 67.01083  | 151.0                   | HG16                     | HT16K                   | Tropiacal semi-desert vegetation                        | 5.2167                                                    | 248.0000                                   |
| 13  | IG 46623  | 36.73889 | 40.27500  | 167.3                   | HG9                      | -                       | Tropiacal semi-desert vegetation                        | 6.8667                                                    | 368.0000                                   |
| 14  | IG 46663  | 30.53333 | 67.25000  | 156.3                   | HG16                     | HT16K                   | Tropiacal semi-desert vegetation                        | 4.2500                                                    | 265.0000                                   |
| 15  | IG 46666  | 30.75000 | 67.55000  | 154.7                   | HG16                     | HT16K                   | Tropiacal semi-desert vegetation                        | 1.6833                                                    | 281.0000                                   |
| 16  | IG 46682  | 30.66667 | 68.66667  | 151.0                   | HG16                     | HT16J                   | Tropiacal semi-desert vegetation                        | 6.7167                                                    | 212.0000                                   |
| 17  | IG 47173  | 39.51667 | 46.36667  | 190.0                   | HG7                      | HT7-35                  | Temperate desert vegetation                             | -1.9000                                                   | 608.0000                                   |
| 18  | IG 47182  | 39.05000 | 48.66667  | 162.3                   | HG7                      | HT7-35                  | Temperate desert vegetation                             | 4.2333                                                    | 656.0000                                   |
| 19  | IG 47186  | 40.08333 | 49.40000  | 168.0                   | HG7                      | HT7-35                  | Temperate desert vegetation                             | 4.6500                                                    | 271.0000                                   |
| 20  | IG 47188  | 40.98333 | 47.83333  | 165.3                   | HG7                      | HT7-11                  | Temperate desert vegetation                             | 1.3667                                                    | 671.0000                                   |
| 21  | IG 47192  | 38.93333 | 48.25000  | 166.7                   | HG7                      | HT7-35                  | Temperate desert vegetation                             | 0.3833                                                    | 424.0000                                   |
| 22  | IG 47193  | 38.75000 | 48.40000  | 166.0                   | HG9                      | -                       | Temperate desert vegetation                             | 0.3500                                                    | 409.0000                                   |
| 23  | IG 47194  | 40.50000 | 50.00000  | 174.3                   | HG7                      | HT7-35                  | Temperate desert vegetation                             | 4.8167                                                    | 249.0000                                   |
| 24  | IG 47196  | 40.38333 | 49.88333  | 162.3                   | HG7                      | HT7-31                  | Temperate desert vegetation                             | 5.0167                                                    | 255.0000                                   |
| 25  | IG 47199  | 40.63333 | 48.61667  | 169.7                   | HG7                      | HT7-35                  | Temperate desert vegetation                             | 1.1833                                                    | 560.0000                                   |
| 26  | IG 47202  | 39.80000 | 46.75000  | 167.0                   | HG7                      | HT7-35                  | Temperate desert vegetation                             | 0.8167                                                    | 548.0000                                   |
| 27  | IG 47203  | 39.38333 | 47.01667  | 170.3                   | HG7                      | HT7-35                  | Temperate desert vegetation                             | 2.3333                                                    | 436.0000                                   |
| 28  | IG 47204  | 41.20000 | 49.03333  | 167.0                   | HG7                      | HT7-35                  | Temperate desert vegetation                             | 3.2833                                                    | 363.0000                                   |
| 29  | IG 47259  | 35.57778 | 38.82222  | 150.3                   | HG7                      | HT7-18                  | Tropiacal semi-desert vegetation                        | 7.7667                                                    | 167.0000                                   |
| 30  | IG 48042  | 34.08333 | 74.80000  | 163.0                   | HG14                     | -                       | Tropiacal semi-desert vegetation                        | 3.1333                                                    | 697.0000                                   |
| 31  | IG 48274  | 42.20000 | 47.91667  | 172.0                   | HG7                      | HT7-35                  | Temperate desert vegetation                             | 1.3000                                                    | 413.0000                                   |
| 32  | IG 48508  | 38.33333 | 55.86667  | 157.0                   | HG7                      | HT7-15                  | Temperate desert vegetation                             | 4.5000                                                    | 226.0000                                   |
| 33  | IG 48518  | 38.45000 | 56.00000  | 154.7                   | HG16                     | HT16L                   | Temperate desert vegetation                             | 3.8500                                                    | 225.0000                                   |
| 34  | IG 48539  | 41.10000 | 69.00000  | 153.7                   | HG16                     | HT16D                   | Temperate desert vegetation                             | 3.2167                                                    | 375.0000                                   |
| 35  | IG 48554  | 39.46667 | 67.50000  | 153.3                   | HG7                      | HT7-20                  | Temperate desert vegetation                             | 1.6167                                                    | 387.0000                                   |
| 36  | IG 48559  | 39.75000 | 68.63333  | 161.0                   | HG16                     | HT16J                   | Temperate desert vegetation                             | -3.4833                                                   | 687.0000                                   |
| 37  | IG 48564  | 40.08333 | 69.11667  | 153.0                   | HG7                      | HT7-2                   | Temperate desert vegetation                             | 1.6833                                                    | 380.0000                                   |
| 38  | IG 48565  | 40.45000 | 71.06667  | 157.7                   | HG16                     | HT16D                   | Temperate desert vegetation                             | 1.1000                                                    | 249.0000                                   |
| 39  | IG 48567  | 40.56667 | 71.70000  | 163.0                   | HG16                     | HT16C                   | Temperate desert vegetation                             | 1.2667                                                    | 210.0000                                   |
| 40  | IG 48747  | 40.28333 | 44.63333  | 175.7                   | HG7                      | HT7-15                  | Temperate desert vegetation                             | -2.7333                                                   | 403.0000                                   |
| 41  | IG 48748  | 40.18333 | 44.66667  | 162.0                   | HG10                     | -                       | Temperate desert vegetation                             | -4.4667                                                   | 438.0000                                   |
| 42  | IG 48758  | 40.25000 | 44.33333  | 165.3                   | HG7                      | HT7-15                  | Temperate desert vegetation                             | -1.7167                                                   | 337.0000                                   |
| 43  | IG 49095  | 36.33333 | 47.83333  | 157.3                   | HG7                      | HT7-30                  | Tropiacal semi-desert vegetation                        | -1.3000                                                   | 392.0000                                   |
| 44  | IG 108561 | 29.88333 | 66.83333  | 153.3                   | HG16                     | HT16J                   | Tropiacal semi-desert vegetation                        | 6.5833                                                    | 199.0000                                   |
| 45  | IG 120735 | 38.53333 | 57.16667  | 164.7                   | HG16                     | HT16H                   | Temperate desert vegetation                             | 3.6333                                                    | 205.0000                                   |

|    |           |          |          |       |      |        |                                  |          |           |
|----|-----------|----------|----------|-------|------|--------|----------------------------------|----------|-----------|
| 46 | IG 120736 | 39.91667 | 66.36667 | 151.7 | HG16 | HT16D  | Temperate desert vegetation      | 2.7667   | 273.0000  |
| 47 | IG 120863 | 41.58333 | 48.28333 | 169.7 | HG7  | HT7-34 | Temperate desert vegetation      | 0.9333   | 476.0000  |
| 48 | IG 120866 | 41.88333 | 48.38333 | 166.3 | HG9  | -      | Temperate desert vegetation      | 2.6167   | 363.0000  |
| 49 | IG 123910 | 40.79722 | 72.36667 | 159.0 | HG16 | HT16D  | Temperate desert vegetation      | 0.4333   | 260.0000  |
| 50 | IG 126273 | 39.99722 | 44.95833 | 165.0 | HG7  | HT7-29 | Temperate desert vegetation      | -3.1500  | 388.0000  |
| 51 | IG 126280 | 39.90278 | 44.94167 | 166.3 | HG7  | HT7-15 | Temperate desert vegetation      | -4.6667  | 418.0000  |
| 52 | IG 126293 | 39.79722 | 45.33333 | 164.3 | HG7  | HT7-15 | Temperate desert vegetation      | -2.0833  | 382.0000  |
| 53 | IG 126353 | 39.71111 | 45.56944 | 166.3 | HG7  | HT7-15 | Temperate desert vegetation      | -2.5500  | 436.0000  |
| 54 | IG 126387 | 38.63889 | 56.85833 | 160.7 | HG16 | HT16O  | Temperate desert vegetation      | 2.8500   | 210.0000  |
| 55 | IG 126489 | 38.01944 | 58.23611 | 151.7 | HG2  | -      | Temperate desert vegetation      | 3.6667   | 231.0000  |
| 56 | IG 126991 | 39.08611 | 46.58056 | 171.7 | HG9  | -      | Temperate desert vegetation      | 1.5000   | 402.0000  |
| 57 | IG 127015 | 39.07778 | 46.30556 | 175.3 | HG7  | HT7-35 | Temperate desert vegetation      | -6.6500  | 478.0000  |
| 58 | IG 131606 | 42.71667 | 72.00833 | 160.3 | HG16 | HT16L  | Temperate desert vegetation      | -12.4000 | 558.0000  |
| 59 | KU-20-1   | 42.05778 | 48.32528 | 173.3 | HG7  | HT7-35 | Temperate desert vegetation      | 2.5000   | 358.0000  |
| 60 | KU-20-6   | 30.07889 | 66.89528 | 149.7 | HG16 | HT16J  | Tropiacal semi-desert vegetation | 2.9000   | 235.0000  |
| 61 | KU-20-7   | 35.84833 | 51.03722 | 159.7 | HG7  | HT7-9  | Tropiacal semi-desert vegetation | 0.1667   | 218.0000  |
| 62 | KU-20-8   | 35.87444 | 52.65389 | 159.7 | HG4  | -      | Tropiacal semi-desert vegetation | -5.4500  | 159.0000  |
| 63 | KU-20-9   | 36.88333 | 53.46778 | 163.7 | HG3  | -      | Temperate desert vegetation      | 8.7333   | 488.0000  |
| 64 | KU-20-10  | 37.03917 | 50.69306 | 164.0 | HG9  | -      | Temperate desert vegetation      | 7.5500   | 1156.0000 |
| 65 | KU-2001   | 30.14528 | 66.90333 | 153.7 | HG16 | HT16E  | Tropiacal semi-desert vegetation | 3.2167   | 241.0000  |
| 66 | KU-2003   | 30.14528 | 66.90333 | 150.0 | HG16 | HT16J  | Tropiacal semi-desert vegetation | 3.2167   | 241.0000  |
| 67 | KU-2006   | 30.69000 | 66.66972 | 147.7 | HG16 | HT16J  | Tropiacal semi-desert vegetation | 6.6833   | 243.0000  |
| 68 | KU-2008   | 31.03444 | 66.32611 | 150.0 | HG16 | HT16J  | Tropiacal semi-desert vegetation | 8.7333   | 212.0000  |
| 69 | KU-2010   | 31.82778 | 66.21333 | 149.7 | HG8  | -      | Tropiacal semi-desert vegetation | 4.3500   | 234.0000  |
| 70 | KU-2012   | 32.03083 | 66.68667 | 150.0 | HG8  | -      | Tropiacal semi-desert vegetation | 1.4167   | 271.0000  |
| 71 | KU-2016   | 32.81250 | 67.74889 | 166.3 | HG7  | HT7-15 | Tropiacal semi-desert vegetation | -4.4500  | 196.0000  |
| 72 | KU-2018   | 33.80417 | 68.40583 | 157.3 | HG16 | HT16F  | Tropiacal semi-desert vegetation | -5.3667  | 273.0000  |
| 73 | KU-2022   | 34.61861 | 69.31250 | 162.0 | HG16 | HT16L  | Tropiacal semi-desert vegetation | 0.7667   | 375.0000  |
| 74 | KU-2025   | 35.91333 | 68.92194 | 160.0 | HG8  | -      | Temperate desert vegetation      | 1.1833   | 474.0000  |
| 75 | KU-2027   | 36.15361 | 68.75083 | 154.0 | HG7  | HT7-16 | Temperate desert vegetation      | 4.0833   | 296.0000  |
| 76 | KU-2028   | 36.17611 | 68.64778 | 149.3 | HG7  | HT7-14 | Temperate desert vegetation      | 3.2000   | 320.0000  |
| 77 | KU-2032   | 36.31194 | 68.59583 | 148.3 | HG7  | HT7-15 | Temperate desert vegetation      | 2.9833   | 326.0000  |
| 78 | KU-2035   | 36.21944 | 68.59472 | 152.3 | HG7  | HT7-15 | Temperate desert vegetation      | 3.2000   | 314.0000  |
| 79 | KU-2039   | 36.23833 | 68.59361 | 148.0 | HG15 | -      | Temperate desert vegetation      | 3.2000   | 314.0000  |
| 80 | KU-2042   | 36.20139 | 68.51639 | 149.3 | HG7  | HT7-27 | Temperate desert vegetation      | 1.8667   | 357.0000  |
| 81 | KU-2043   | 37.35444 | 64.98361 | 150.3 | HG15 | -      | Temperate desert vegetation      | 4.3833   | 240.0000  |
| 82 | KU-2044   | 36.08306 | 65.03167 | 150.7 | HG15 | -      | Temperate desert vegetation      | 3.3167   | 368.0000  |
| 83 | KU-2050   | 36.00750 | 64.78917 | 148.3 | HG16 | HT16G  | Temperate desert vegetation      | 3.9667   | 388.0000  |
| 84 | KU-2051   | 35.91333 | 64.87972 | 148.0 | HG16 | HT16G  | Temperate desert vegetation      | 3.1000   | 357.0000  |
| 85 | KU-2056   | 35.94944 | 64.89500 | 153.7 | HG16 | HT16K  | Temperate desert vegetation      | 3.8000   | 365.0000  |
| 86 | KU-2058   | 35.81056 | 64.59139 | 151.7 | HG7  | HT7-16 | Temperate desert vegetation      | 3.2333   | 366.0000  |
| 87 | KU-2059   | 35.73556 | 64.27333 | 152.0 | HG16 | HT16J  | Temperate desert vegetation      | 2.1167   | 368.0000  |
| 88 | KU-2061   | 35.78417 | 63.94861 | 147.7 | HG16 | HT16A  | Temperate desert vegetation      | 3.4500   | 367.0000  |
| 89 | KU-2063   | 35.51111 | 64.09056 | 148.7 | HG16 | HT16L  | Temperate desert vegetation      | -3.7000  | 360.0000  |
| 90 | KU-2066   | 35.24722 | 63.46167 | 147.7 | HG16 | HT16P  | Temperate desert vegetation      | 4.1667   | 343.0000  |
| 91 | KU-2068   | 36.37750 | 50.09389 | 153.0 | HG16 | HT16K  | Tropiacal semi-desert vegetation | 0.2833   | 275.0000  |
| 92 | KU-2069   | 35.84833 | 51.03722 | 160.7 | HG7  | HT7-9  | Tropiacal semi-desert vegetation | 0.1667   | 218.0000  |
| 93 | KU-2074   | 36.88333 | 53.46778 | 164.3 | HG5  | -      | Temperate desert vegetation      | 8.7333   | 488.0000  |

|     |         |          |          |       |      |        |                                  |         |           |
|-----|---------|----------|----------|-------|------|--------|----------------------------------|---------|-----------|
| 94  | KU-2075 | 36.87139 | 53.73028 | 167.0 | HG12 | -      | Temperate desert vegetation      | 8.9500  | 453.0000  |
| 95  | KU-2076 | 37.09500 | 54.32639 | 159.3 | HG9  | -      | Temperate desert vegetation      | 8.7167  | 389.0000  |
| 96  | KU-2077 | 37.19722 | 54.92944 | 163.7 | HG7  | HT7-3  | Temperate desert vegetation      | 8.9667  | 368.0000  |
| 97  | KU-2078 | 37.14000 | 54.82806 | 158.3 | HG9  | -      | Temperate desert vegetation      | 9.0000  | 377.0000  |
| 98  | KU-2079 | 37.14000 | 54.82806 | 162.7 | HG9  | -      | Temperate desert vegetation      | 9.0000  | 377.0000  |
| 99  | KU-2080 | 37.26861 | 55.10944 | 160.7 | HG9  | -      | Temperate desert vegetation      | 8.8167  | 357.0000  |
| 100 | KU-2082 | 37.16583 | 55.31139 | 159.7 | HG16 | HT16N  | Temperate desert vegetation      | 7.5833  | 341.0000  |
| 101 | KU-2083 | 37.09667 | 55.30194 | 160.3 | HG7  | HT7-36 | Temperate desert vegetation      | 6.5833  | 318.0000  |
| 102 | KU-2086 | 35.91611 | 52.77000 | 165.5 | HG7  | HT7-6  | Tropiacal semi-desert vegetation | -3.9500 | 153.0000  |
| 103 | KU-2087 | 36.74167 | 53.28750 | 159.7 | HG16 | HT16N  | Temperate desert vegetation      | 8.9500  | 595.0000  |
| 104 | KU-2088 | 36.92250 | 53.38111 | 161.3 | HG9  | -      | Temperate desert vegetation      | 8.5833  | 498.0000  |
| 105 | KU-2090 | 36.85639 | 53.60750 | 161.7 | HG9  | -      | Temperate desert vegetation      | 8.9167  | 475.0000  |
| 106 | KU-2091 | 36.92111 | 52.60167 | 158.0 | HG18 | -      | Temperate desert vegetation      | 8.2000  | 752.0000  |
| 107 | KU-2092 | 36.92111 | 52.60167 | 160.7 | HG1  | -      | Temperate desert vegetation      | 8.2000  | 752.0000  |
| 108 | KU-2093 | 36.86556 | 52.42139 | 162.0 | HG7  | HT7-12 | Temperate desert vegetation      | 8.2500  | 818.0000  |
| 109 | KU-2096 | 36.86556 | 52.42139 | 158.7 | HG9  | -      | Temperate desert vegetation      | 8.2500  | 818.0000  |
| 110 | KU-2097 | 36.86556 | 52.42139 | 151.3 | HG7  | HT7-13 | Temperate desert vegetation      | 8.2500  | 818.0000  |
| 111 | KU-2098 | 36.95444 | 50.74500 | 157.3 | HG9  | -      | Temperate desert vegetation      | 7.6500  | 1146.0000 |
| 112 | KU-2100 | 37.07000 | 50.47194 | 162.0 | HG9  | -      | Temperate desert vegetation      | 7.6833  | 1165.0000 |
| 113 | KU-2101 | 37.16750 | 50.45694 | 159.3 | HG9  | -      | Temperate desert vegetation      | 7.5500  | 1177.0000 |
| 114 | KU-2102 | 37.31972 | 50.33694 | 157.7 | HG9  | -      | Temperate desert vegetation      | 7.4833  | 1188.0000 |
| 115 | KU-2103 | 37.33583 | 49.72694 | 157.3 | HG9  | -      | Temperate desert vegetation      | 7.7500  | 1358.0000 |
| 116 | KU-2104 | 37.58972 | 49.61556 | 159.3 | HG7  | HT7-11 | Temperate desert vegetation      | 7.5167  | 1426.0000 |
| 117 | KU-2105 | 37.66000 | 49.44472 | 164.3 | HG9  | -      | Temperate desert vegetation      | 7.5000  | 1438.0000 |
| 118 | KU-2106 | 37.67417 | 49.40000 | 157.0 | HG9  | -      | Temperate desert vegetation      | 7.4500  | 1417.0000 |
| 119 | KU-2107 | 38.19194 | 49.00972 | 166.5 | HG9  | -      | Temperate desert vegetation      | 6.4500  | 1245.0000 |
| 120 | KU-2108 | 38.19194 | 49.00972 | 157.7 | HG9  | -      | Temperate desert vegetation      | 6.4500  | 1245.0000 |
| 121 | KU-2109 | 38.49056 | 49.02028 | 159.3 | HG7  | HT7-17 | Temperate desert vegetation      | 5.7500  | 1162.0000 |
| 122 | KU-2110 | 38.43472 | 48.75500 | 172.0 | HG7  | HT7-8  | Temperate desert vegetation      | 5.2500  | 1127.0000 |
| 123 | KU-2111 | 38.34667 | 48.42139 | 170.0 | HG7  | HT7-35 | Temperate desert vegetation      | -0.2167 | 365.0000  |
| 124 | KU-2112 | 38.26111 | 48.28917 | 168.0 | HG7  | HT7-35 | Temperate desert vegetation      | -0.6500 | 326.0000  |
| 125 | KU-2113 | 36.75806 | 45.94056 | 160.3 | HG7  | HT7-16 | Tropiacal semi-desert vegetation | -1.9833 | 436.0000  |
| 126 | KU-2115 | 37.07167 | 45.74083 | 158.3 | HG7  | HT7-15 | Tropiacal semi-desert vegetation | 0.2667  | 409.0000  |
| 127 | KU-2116 | 38.29417 | 45.02472 | 166.0 | HG7  | HT7-15 | Tropiacal semi-desert vegetation | -2.3500 | 353.0000  |
| 128 | KU-2118 | 38.62194 | 45.10333 | 160.3 | HG4  | -      | Tropiacal semi-desert vegetation | 0.3167  | 278.0000  |
| 129 | KU-2120 | 38.49167 | 45.87583 | 159.0 | HG7  | HT7-17 | Tropiacal semi-desert vegetation | -1.4000 | 338.0000  |
| 130 | KU-2121 | 38.37500 | 46.13444 | 165.7 | HG7  | HT7-15 | Tropiacal semi-desert vegetation | -2.7667 | 365.0000  |
| 131 | KU-2122 | 38.08417 | 46.40611 | 153.7 | HG7  | HT7-33 | Tropiacal semi-desert vegetation | -1.1667 | 334.0000  |
| 132 | KU-2124 | 36.71722 | 51.46000 | 153.0 | HG4  | -      | Temperate desert vegetation      | 7.9667  | 1092.0000 |
| 133 | KU-2126 | 36.71722 | 51.46000 | 154.0 | HG4  | -      | Temperate desert vegetation      | 7.9667  | 1092.0000 |
| 134 | KU-2131 | 38.29222 | 43.15306 | 167.3 | HG7  | HT7-14 | Tropiacal semi-desert vegetation | -1.5333 | 518.0000  |
| 135 | KU-2132 | 38.29222 | 43.15306 | 166.3 | HG7  | HT7-14 | Tropiacal semi-desert vegetation | -1.5333 | 518.0000  |
| 136 | KU-2133 | 38.63556 | 43.82889 | 163.0 | HG7  | HT7-14 | Tropiacal semi-desert vegetation | -5.7167 | 449.0000  |
| 137 | KU-2136 | 38.91944 | 43.62222 | 164.7 | HG7  | HT7-14 | Tropiacal semi-desert vegetation | -3.3000 | 460.0000  |
| 138 | KU-2137 | 39.06583 | 43.53556 | 165.7 | HG7  | HT7-14 | Tropiacal semi-desert vegetation | -4.5167 | 473.0000  |
| 139 | KU-2138 | 39.03917 | 43.51389 | 167.0 | HG7  | HT7-14 | Tropiacal semi-desert vegetation | -4.1167 | 469.0000  |
| 140 | KU-2140 | 39.03917 | 43.51389 | 165.7 | HG7  | HT7-14 | Tropiacal semi-desert vegetation | -4.1167 | 469.0000  |
| 141 | KU-2141 | 38.94278 | 43.40583 | 164.7 | HG7  | HT7-14 | Tropiacal semi-desert vegetation | -3.0500 | 456.0000  |

|     |          |          |          |       |      |        |                                  |          |           |
|-----|----------|----------|----------|-------|------|--------|----------------------------------|----------|-----------|
| 142 | KU-2142  | 39.31667 | 44.84472 | 169.0 | HG7  | HT7-14 | Tropiacal semi-desert vegetation | -0.2000  | 257.0000  |
| 143 | KU-2143  | 39.25944 | 45.06583 | 164.3 | HG7  | HT7-14 | Tropiacal semi-desert vegetation | 0.2000   | 258.0000  |
| 144 | KU-2144  | 39.24278 | 45.16333 | 167.7 | HG10 | -      | Tropiacal semi-desert vegetation | 0.3000   | 257.0000  |
| 145 | KU-2145  | 39.10028 | 45.24222 | 161.7 | HG7  | HT7-16 | Tropiacal semi-desert vegetation | -0.0500  | 263.0000  |
| 146 | KU-2148  | 38.74583 | 45.89806 | 162.7 | HG7  | HT7-15 | Tropiacal semi-desert vegetation | -5.5500  | 420.0000  |
| 147 | KU-2149  | 38.90278 | 45.75583 | 162.0 | HG7  | HT7-15 | Tropiacal semi-desert vegetation | 1.3667   | 283.0000  |
| 148 | KU-2150  | 38.79639 | 45.77444 | 162.0 | HG7  | HT7-15 | Tropiacal semi-desert vegetation | -1.4000  | 349.0000  |
| 149 | KU-2151  | 37.43806 | 47.66778 | 158.3 | HG7  | HT7-19 | Tropiacal semi-desert vegetation | 2.0500   | 419.0000  |
| 150 | KU-2152  | 37.15028 | 47.92639 | 161.0 | HG7  | HT7-28 | Tropiacal semi-desert vegetation | 2.1500   | 430.0000  |
| 151 | KU-2153  | 36.32806 | 50.14722 | 159.0 | HG7  | HT7-6  | Tropiacal semi-desert vegetation | 2.0833   | 293.0000  |
| 152 | KU-2154  | 35.98694 | 49.60972 | 156.0 | HG16 | HT16K  | Tropiacal semi-desert vegetation | 3.3333   | 307.0000  |
| 153 | KU-2155  | 35.63250 | 49.39611 | 159.0 | HG4  | -      | Tropiacal semi-desert vegetation | -0.1500  | 285.0000  |
| 154 | KU-2156  | 35.63250 | 49.39611 | 159.7 | HG4  | -      | Tropiacal semi-desert vegetation | -0.1500  | 285.0000  |
| 155 | KU-2157  | 34.15750 | 46.56167 | 162.0 | HG7  | HT7-32 | Tropiacal semi-desert vegetation | 2.6833   | 479.0000  |
| 156 | KU-2158  | 36.95444 | 50.74500 | 160.0 | HG7  | HT7-5  | Temperate desert vegetation      | 7.6500   | 1146.0000 |
| 157 | KU-2159  | 36.95444 | 50.74500 | 158.0 | HG7  | HT7-5  | Temperate desert vegetation      | 7.6500   | 1146.0000 |
| 158 | KU-2160  | 36.95444 | 50.74500 | 165.7 | HG9  | -      | Temperate desert vegetation      | 7.6500   | 1146.0000 |
| 159 | KU-2612  | 34.64000 | 68.95833 | 164.3 | HG16 | HT16F  | Tropiacal semi-desert vegetation | -8.3667  | 736.0000  |
| 160 | KU-2616  | 36.61250 | 70.12444 | 154.0 | HG16 | HT16D  | Temperate desert vegetation      | -9.1833  | 983.0000  |
| 161 | KU-2617  | 36.63972 | 70.07222 | 154.7 | HG7  | HT7-1  | Temperate desert vegetation      | -4.2833  | 821.0000  |
| 162 | KU-2619  | 37.19472 | 71.26667 | 166.3 | HG16 | HT16B  | Temperate desert vegetation      | -10.8167 | 652.0000  |
| 163 | KU-2621  | 37.19194 | 71.24000 | 167.7 | HG16 | HT16B  | Temperate desert vegetation      | -13.0667 | 756.0000  |
| 164 | KU-2624  | 36.87889 | 71.39167 | 166.0 | HG16 | HT16J  | Temperate desert vegetation      | -16.5000 | 832.0000  |
| 165 | KU-2627  | 36.79611 | 71.16194 | 166.3 | HG16 | HT16I  | Temperate desert vegetation      | -10.0333 | 713.0000  |
| 166 | KU-2630  | 37.01556 | 71.59806 | 168.0 | HG11 | -      | Temperate desert vegetation      | -15.3167 | 730.0000  |
| 167 | KU-2632  | 36.97806 | 71.59972 | 170.0 | HG16 | HT16L  | Temperate desert vegetation      | -15.9833 | 753.0000  |
| 168 | KU-2633  | 36.93361 | 71.44556 | 164.7 | HG7  | HT7-14 | Temperate desert vegetation      | -11.5333 | 656.0000  |
| 169 | KU-2635  | 36.88222 | 71.54778 | 165.0 | HG16 | HT16J  | Temperate desert vegetation      | -10.3500 | 583.0000  |
| 170 | KU-2636  | 36.61972 | 71.49667 | 165.3 | HG16 | HT16D  | Temperate desert vegetation      | -12.0833 | 708.0000  |
| 171 | KU-2638  | 36.57083 | 71.53611 | 167.3 | HG16 | HT16F  | Temperate desert vegetation      | -15.8667 | 799.0000  |
| 172 | KU-2639  | 36.40028 | 69.11222 | 148.0 | HG16 | HT16M  | Temperate desert vegetation      | 2.0333   | 462.0000  |
| 173 | KU-2801  | 40.65639 | 49.78861 | 167.0 | HG7  | HT7-35 | Temperate desert vegetation      | 4.8000   | 297.0000  |
| 174 | KU-2804  | 40.58500 | 48.85250 | 168.0 | HG7  | HT7-9  | Temperate desert vegetation      | 0.7500   | 506.0000  |
| 175 | KU-2806  | 40.58500 | 48.85250 | 166.7 | HG9  | -      | Temperate desert vegetation      | 0.7500   | 506.0000  |
| 176 | KU-2809  | 40.24528 | 44.62111 | 172.7 | HG7  | HT7-16 | Temperate desert vegetation      | -2.6167  | 385.0000  |
| 177 | KU-2810  | 40.24528 | 44.62111 | 162.3 | HG10 | -      | Temperate desert vegetation      | -2.6167  | 385.0000  |
| 178 | KU-2811  | 40.24528 | 44.62111 | 159.3 | HG4  | -      | Temperate desert vegetation      | -2.6167  | 385.0000  |
| 179 | KU-2814  | 40.24528 | 44.62111 | 162.7 | HG10 | -      | Temperate desert vegetation      | -2.6167  | 385.0000  |
| 180 | KU-2816  | 40.22028 | 44.55194 | 162.7 | HG10 | -      | Temperate desert vegetation      | -2.2667  | 365.0000  |
| 181 | KU-2821  | 40.19528 | 44.74778 | 165.7 | HG7  | HT7-25 | Temperate desert vegetation      | -5.0000  | 454.0000  |
| 182 | KU-2822A | 40.39139 | 44.26861 | 160.7 | HG7  | HT7-4  | Temperate desert vegetation      | -6.6167  | 508.0000  |
| 183 | KU-2823  | 40.38333 | 44.29806 | 161.3 | HG7  | HT7-24 | Temperate desert vegetation      | -5.6333  | 480.0000  |
| 184 | KU-2824  | 40.38333 | 44.29806 | 160.7 | HG10 | -      | Temperate desert vegetation      | -5.6333  | 480.0000  |
| 185 | KU-2826  | 41.54806 | 45.10139 | 174.7 | HG7  | HT7-23 | Temperate desert vegetation      | 2.9833   | 507.0000  |
| 186 | KU-2827  | 41.75944 | 44.85167 | 168.0 | HG9  | -      | Temperate desert vegetation      | 1.6667   | 585.0000  |
| 187 | KU-2828  | 41.84000 | 44.93861 | 168.0 | HG7  | HT7-22 | Temperate desert vegetation      | -1.6167  | 840.0000  |
| 188 | KU-2829A | 41.82333 | 44.81750 | 172.7 | HG17 | -      | Temperate desert vegetation      | 1.9500   | 569.0000  |
| 189 | KU-2832  | 41.82333 | 44.81750 | 171.0 | HG17 | -      | Temperate desert vegetation      | 1.9500   | 569.0000  |

|     |           |          |          |       |      |        |                                  |         |          |
|-----|-----------|----------|----------|-------|------|--------|----------------------------------|---------|----------|
| 190 | KU-2834   | 41.82333 | 44.81750 | 164.7 | HG7  | HT7-10 | Temperate desert vegetation      | 1.9500  | 569.0000 |
| 191 | KU-2835B  | 42.08694 | 44.48472 | 174.3 | HG9  | -      | Temperate desert vegetation      | -0.9000 | 804.0000 |
| 192 | KU-2836   | 42.06556 | 44.26278 | 172.0 | HG7  | HT7-21 | Temperate desert vegetation      | -0.3833 | 693.0000 |
| 193 | PI 476874 | 36.08306 | 65.03167 | 149.3 | HG15 | -      | Temperate desert vegetation      | 3.3167  | 368.0000 |
| 194 | PI 486267 | 37.20000 | 44.61667 | 162.3 | HG4  | -      | Tropiacal semi-desert vegetation | -6.5000 | 595.0000 |
| 195 | PI 486270 | 37.78333 | 44.33333 | 162.7 | HG7  | HT7-15 | Tropiacal semi-desert vegetation | -9.6000 | 547.0000 |
| 196 | PI 486274 | 40.15000 | 43.36667 | 169.3 | HG7  | HT7-14 | Tropiacal semi-desert vegetation | -5.1667 | 404.0000 |
| 197 | PI 486277 | 40.08333 | 42.93333 | 172.0 | HG7  | HT7-5  | Tropiacal semi-desert vegetation | -7.4000 | 510.0000 |
| 198 | PI 499262 | 44.00000 | 81.00000 | 171.7 | HG6  | -      | Temperate desert vegetation      | -7.1333 | 261.0000 |
| 199 | PI 508262 | 44.00000 | 81.00000 | 180.7 | HG6  | -      | Temperate desert vegetation      | -7.1333 | 261.0000 |
| 200 | PI 554319 | 37.48333 | 43.71667 | 163.7 | HG7  | HT7-26 | Tropiacal semi-desert vegetation | -3.2833 | 746.0000 |

Longitude and latitude are given as decimal degrees. See text for details of cpDNA haplotypes. AE accessions were provided by Institut für Pflanzengenetik und Kulturpflanzenforschung; AT accessions by Okayama University; CGN accessions by Centre for Genetic Resources, The Netherlands; IG accessions by International Center for Agricultural Research in the Dry Areas; KU accessions by Plant Germ-plasm Institute, Kyoto University; and PI accessions by United States Department of Agriculture.

<sup>1)</sup> Chloroplast DNA haplogroups based on variations at 21 biallelic sites (Table S2).

<sup>2)</sup> Chloroplast DNA haplotypes based on variations at 14 loci (Table S3).

<sup>3)</sup> Vegetations 25,000-15,000BP for the sampling sites (estimated from [28]).

<sup>4)</sup> Estimated using the DIVA-GIS software [21].
