# Supplementary material for: Flowering Time Diversification and Dispersal in Central Eurasian Wild Wheat Aegilops tauschii Coss.: Genealogical and Ecological Framework
Source: PubMed Central journal article supplement (PMC2519791; doi:10.1371/journal.pone.0003138), 2008-09-04
Supplement: pone.0003138.s002.pdf [file pone.0003138.s002.pdf]

**Table S2.** Chloroplast haplogroups and defining biallelic variations

| cpDNA<br>Haplogroup | No. of<br>accessions | Haplogroup-defining-site name |                |                |                 |                |                |                |                |                |                 |               |               |                |                |                |                |                |                 |                        |                        |                        |
|---------------------|----------------------|-------------------------------|----------------|----------------|-----------------|----------------|----------------|----------------|----------------|----------------|-----------------|---------------|---------------|----------------|----------------|----------------|----------------|----------------|-----------------|------------------------|------------------------|------------------------|
|                     |                      | WCt6c<br>(109)                | WCt6d<br>(113) | WCt6e<br>(119) | WCt10b<br>(141) | WCt10c<br>(97) | WCt10d<br>(83) | WCt10e<br>(32) | WCt10f<br>(30) | WCt17b<br>(56) | WCt17c<br>(345) | WCt24b<br>(7) | WC24c<br>(33) | WCt24e<br>(37) | WCt24f<br>(40) | WCt24g<br>(41) | WCt24h<br>(31) | WCt24i<br>(99) | WCt24j<br>(112) | <i>trnLFb</i><br>(154) | <i>trnTLa</i><br>(202) | <i>trnTLb</i><br>(192) |
| HG1                 | 1                    | G                             | G              | A              | C               | A              | A              | A              | T              | TTC            | G               | TAAAAAA       | T             | T              | C              | T              | 2              | T              | G               | T                      | 1                      | G                      |
| HG2                 | 1                    | G                             | G              | A              | C               | A              | A              | T              | G              | TTC            | G               | TAAAAAA       | T             | T              | C              | T              | 1              | T              | G               | C                      | 1                      | G                      |
| HG3                 | 1                    | G                             | G              | A              | C               | A              | A              | T              | T              | TTC            | A               | TAAAAAA       | T             | T              | C              | T              | 2              | T              | G               | T                      | 1                      | G                      |
| HG4                 | 8                    | G                             | G              | A              | C               | A              | A              | T              | T              | TTC            | G               | TAAAAAA       | A             | A              | G              | A              | 1              | T              | G               | T                      | 1                      | G                      |
| HG5                 | 1                    | G                             | G              | A              | C               | A              | A              | T              | T              | TTC            | G               | TAAAAAA       | T             | T              | C              | T              | 1              | T              | A               | T                      | 1                      | G                      |
| HG6                 | 2                    | G                             | G              | A              | C               | A              | A              | T              | T              | TTC            | G               | TAAAAAA       | T             | T              | C              | T              | 1              | T              | G               | C                      | 1                      | G                      |
| HG7                 | 90                   | G                             | G              | A              | C               | A              | A              | T              | T              | TTC            | G               | TAAAAAA       | T             | T              | C              | T              | 1              | T              | G               | T                      | 1                      | G                      |
| HG8                 | 3                    | G                             | G              | A              | C               | A              | A              | T              | T              | TTC            | G               | TAAAAAA       | T             | T              | C              | T              | 1              | T              | G               | T                      | 2                      | C                      |
| HG9                 | 25                   | G                             | G              | A              | C               | A              | A              | T              | T              | TTC            | G               | TAAAAAA       | T             | T              | C              | T              | 2              | T              | G               | T                      | 1                      | G                      |
| HG10                | 6                    | G                             | G              | A              | C               | A              | A              | T              | T              | TTC            | G               | ATCTTATTTA    | T             | T              | C              | T              | 1              | T              | G               | T                      | 1                      | G                      |
| HG11                | 1                    | G                             | G              | A              | C               | A              | C              | T              | T              | TTC            | G               | TAAAAAA       | T             | T              | C              | T              | 1              | T              | G               | T                      | 1                      | G                      |
| HG12                | 1                    | G                             | G              | A              | C               | C              | A              | T              | T              | TTC            | G               | TAAAAAA       | T             | T              | C              | T              | 1              | T              | G               | T                      | 1                      | G                      |
| HG13                | 1                    | G                             | G              | A              | T               | A              | A              | T              | T              | TTC            | G               | TAAAAAA       | T             | T              | C              | T              | 1              | T              | G               | T                      | 2                      | C                      |
| HG14                | 1                    | G                             | G              | C              | C               | A              | A              | T              | T              | TTC            | G               | TAAAAAA       | T             | T              | C              | T              | 1              | T              | G               | C                      | 1                      | G                      |
| HG15                | 4                    | G                             | T              | A              | C               | A              | A              | T              | T              | AAA            | G               | TAAAAAA       | T             | T              | C              | T              | 1              | T              | G               | T                      | 1                      | G                      |
| HG16                | 48                   | G                             | T              | A              | C               | A              | A              | T              | T              | TTC            | G               | TAAAAAA       | T             | T              | C              | T              | 1              | T              | G               | T                      | 1                      | G                      |
| HG17                | 5                    | T                             | G              | A              | C               | A              | A              | T              | T              | TTC            | G               | TAAAAAA       | T             | T              | C              | T              | 1              | G              | G               | T                      | 1                      | G                      |
| HG18                | 1                    | T                             | G              | A              | C               | A              | A              | T              | T              | TTC            | G               | TAAAAAA       | T             | T              | C              | T              | 2              | T              | G               | T                      | 1                      | G                      |

Site positions, based on aligned sequences, counted from the nucleotide next to the 3' end of the forward primer are in parentheses.

The WCt17 locus was amplified using WCt17 forward and WCt18 reverse primers [14].

WCt24h has one or two repeats of the unit minisatellite CTTCGTTACCTAGTTATTTT.

*trnLFb* is in the intergenic spacer region between the *trnL* (UAA) and *trnF* (GAA) genes [16].

*trnTLa* and *trnTLb* are in the intergenic spacer region between the *trnT* (UGU) and *trnL* (UAA) genes [16].

*trnTLa* has one or two repeats of the unit sequence ATTTTT.
