# Supplementary material for: Flowering Time Diversification and Dispersal in Central Eurasian Wild Wheat Aegilops tauschii Coss.: Genealogical and Ecological Framework
Source: PubMed Central journal article supplement (PMC2519791; doi:10.1371/journal.pone.0003138), 2008-09-04
Supplement: pone.0003138.s003.pdf [file pone.0003138.s003.pdf]

**Table S3.** Chloroplast haplotypes and defining variations

| Haplotype | No. of accessions | Locus name      |                 |                 |                  |                  |                |                 |                   |                  |                   |                  |                    |                |                         |
|-----------|-------------------|-----------------|-----------------|-----------------|------------------|------------------|----------------|-----------------|-------------------|------------------|-------------------|------------------|--------------------|----------------|-------------------------|
|           |                   | WCt1<br>(19, A) | WCt4<br>(39, T) | WCt5<br>(19, A) | WCt6a<br>(31, T) | WCt6b<br>(78, C) | WCt6d<br>(113) | WCt8<br>(44, T) | WCt10a<br>(49, A) | WCt12<br>(38, T) | WCt17a<br>(39, T) | WCt19<br>(34, A) | WCt24a<br>(104, A) | WCt24d<br>(38) | <i>trnL</i> Fc<br>(276) |
| HT7-1     | 1                 | 9               | 9               | 12              | 9                | 9                | G              | 8               | 9                 | 12               | 9                 | 8                | 9                  | C              | TTTAAAA                 |
| HT7-2     | 1                 | 9               | 9               | 12              | 9                | 9                | G              | 8               | 9                 | 12               | 10                | 8                | 9                  | C              | TTTAAAA                 |
| HT7-3     | 1                 | 9               | 9               | 15              | 9                | 8                | G              | 8               | 10                | 11               | 12                | 8                | 9                  | C              | TTTAAAA                 |
| HT7-4     | 1                 | 10              | 9               | 10              | 9                | 8                | G              | 8               | 10                | 10               | 10                | 8                | 10                 | C              | TTTAAAA                 |
| HT7-5     | 3                 | 10              | 9               | 10              | 9                | 8                | G              | 8               | 10                | 10               | 10                | 8                | 11                 | C              | TTTAAAA                 |
| HT7-6     | 2                 | 10              | 9               | 10              | 9                | 8                | G              | 8               | 10                | 10               | 10                | 8                | AAAAATAAAAA        | C              | TTTAAAA                 |
| HT7-7     | 1                 | 10              | 9               | 10              | 9                | 8                | G              | 8               | 10                | 10               | 10                | 9                | 11                 | C              | TTTAAAA                 |
| HT7-8     | 1                 | 10              | 9               | 10              | 9                | 9                | G              | 8               | 10                | 10               | 9                 | 8                | 8                  | T              | TTTAAAA                 |
| HT7-9     | 3                 | 10              | 9               | 11              | 8                | 8                | G              | 8               | 10                | 11               | 11                | 8                | 9                  | C              | TTTAAAA                 |
| HT7-10    | 1                 | 10              | 9               | 11              | 9                | 8                | G              | 8               | 10                | 10               | 10                | 8                | 11                 | C              | TTTAAAA                 |
| HT7-11    | 3                 | 10              | 9               | 11              | 9                | 8                | G              | 8               | 10                | 11               | 10                | 8                | 9                  | T              | TTTAAAA                 |
| HT7-12    | 1                 | 10              | 9               | 11              | 9                | 10               | G              | 8               | 10                | 10               | 12                | 8                | 9                  | T              | TTTAAAA                 |
| HT7-13    | 1                 | 10              | 9               | 11              | 10               | 8                | G              | 8               | 10                | 11               | 12                | 8                | 9                  | T              | TTTAAAA                 |
| HT7-14    | 13                | 10              | 9               | 12              | 9                | 9                | G              | 8               | 9                 | 12               | 10                | 8                | 9                  | C              | TTTAAAA                 |
| HT7-15    | 17                | 10              | 9               | 12              | 9                | 9                | G              | 8               | 9                 | 12               | 11                | 8                | 9                  | C              | TTTAAAA                 |
| HT7-16    | 5                 | 10              | 9               | 12              | 9                | 9                | G              | 8               | 9                 | 12               | 12                | 8                | 9                  | C              | TTTAAAA                 |
| HT7-17    | 2                 | 10              | 9               | 12              | 9                | 9                | G              | 8               | 9                 | 12               | 12                | 8                | 9                  | C              | TTTAAAA                 |
| HT7-18    | 1                 | 10              | 9               | 12              | 9                | 9                | G              | 8               | 9                 | 12               | 13                | 8                | 9                  | C              | TTTAAAA                 |
| HT7-19    | 1                 | 10              | 9               | 12              | 9                | 8                | G              | 8               | 10                | 10               | 10                | 8                | 11                 | C              | TTTAAAA                 |
| HT7-20    | 1                 | 10              | 9               | 12              | 9                | 9                | G              | 8               | 10                | 12               | 10                | 8                | 9                  | C              | TTTAAAA                 |
| HT7-21    | 1                 | 10              | 9               | 13              | 9                | 8                | G              | 9               | 10                | 10               | 11                | 8                | 9                  | C              | TTTAAAA                 |
| HT7-22    | 1                 | 10              | 9               | 13              | 9                | 8                | G              | 9               | 10                | 9                | 12                | 8                | 9                  | C              | TTTAAAA                 |
| HT7-23    | 1                 | 10              | 9               | 13              | 9                | 8                | G              | 9               | 10                | 10               | 11                | 8                | 9                  | C              | TTTAAAA                 |
| HT7-24    | 1                 | 10              | 9               | 13              | 9                | 9                | G              | 8               | 9                 | 12               | 12                | 8                | 9                  | C              | TTTAAAA                 |
| HT7-25    | 1                 | 10              | 9               | 13              | 9                | 9                | G              | 8               | 10                | 11               | 11                | 8                | 9                  | C              | TTTAAAA                 |
| HT7-26    | 1                 | 10              | 9               | 13              | 9                | 9                | G              | 8               | 10                | 11               | 12                | 8                | 9                  | C              | TTTAAAA                 |
| HT7-27    | 1                 | 10              | 9               | 13              | 10               | 9                | G              | 8               | 9                 | 12               | 11                | 8                | 9                  | C              | TTTAAAA                 |
| HT7-28    | 1                 | 10              | 9               | 14              | 9                | 8                | G              | 8               | 10                | 11               | 12                | 8                | 10                 | C              | TTTAAAA                 |
| HT7-29    | 1                 | 10              | 9               | 14              | 9                | 8                | G              | 8               | 10                | 11               | 13                | 8                | 9                  | C              | TTTAAAA                 |
| HT7-30    | 1                 | 10              | 9               | 14              | 9                | 8                | G              | 8               | 10                | 12               | 12                | 8                | 10                 | C              | TTTAAAA                 |
| HT7-31    | 1                 | 10              | 9               | 14              | 9                | 8                | G              | 9               | 10                | 10               | 11                | 8                | 9                  | C              | TTTAAAA                 |
| HT7-32    | 1                 | 10              | 9               | 15              | 9                | 9                | G              | 8               | 10                | 11               | 12                | 8                | 9                  | C              | TTTAAAA                 |
| HT7-33    | 1                 | 10              | 9               | 16              | 9                | 8                | G              | 8               | 10                | 11               | 10                | 8                | 10                 | C              | TTTAAAA                 |
| HT7-34    | 1                 | 10              | 10              | 11              | 8                | 8                | G              | 8               | 11                | 11               | 9                 | 8                | 10                 | C              | TTTAAAA                 |
| HT7-35    | 15                | 10              | 10              | 11              | 8                | 8                | G              | 8               | 11                | 11               | 9                 | 8                | 11                 | C              | TTTAAAA                 |
| HT7-36    | 1                 | 10              | 10              | 12              | 8                | 8                | G              | 8               | 11                | 11               | 9                 | 8                | 11                 | C              | TTTAAAA                 |
| HT16A     | 1                 | 10              | 9               | 10              | 9                | 8                | T              | 8               | 10                | 10               | 11                | 8                | 11                 | C              | TTTAAAA                 |
| HT16B     | 2                 | 10              | 9               | 10              | 9                | 8                | T              | 8               | 10                | 10               | 11                | 8                | 10                 | C              | TTTAAAA                 |
| HT16C     | 1                 | 10              | 9               | 11              | 8                | 8                | T              | 8               | 10                | 11               | 10                | 8                | 9                  | C              | TTTAAAA                 |
| HT16D     | 7                 | 10              | 9               | 11              | 9                | 8                | T              | 8               | 9                 | 10               | 10                | 8                | 9                  | C              | TTTAAAA                 |
| HT16E     | 1                 | 10              | 9               | 11              | 9                | 8                | T              | 8               | 10                | 10               | 9                 | 8                | 9                  | C              | TTTAAAA                 |
| HT16F     | 3                 | 10              | 9               | 11              | 9                | 8                | T              | 8               | 10                | 10               | 10                | 8                | 10                 | C              | TTTAAAA                 |
| HT16G     | 2                 | 11              | 9               | 11              | 9                | 8                | T              | 8               | 10                | 10               | 10                | 8                | 10                 | C              | TTTAAAA                 |
| HT16H     | 1                 | 10              | 9               | 11              | 9                | 8                | T              | 8               | 10                | 10               | 10                | 8                | 11                 | C              | TTTAAAA                 |
| HT16I     | 1                 | 10              | 9               | 11              | 9                | 8                | T              | 8               | 10                | 10               | 11                | 8                | 10                 | C              | TTTAAAA                 |
| HT16J     | 12                | 10              | 9               | 11              | 9                | 8                | T              | 8               | 10                | 11               | 9                 | 8                | 9                  | C              | TTTAAAA                 |
| HT16K     | 7                 | 10              | 9               | 11              | 9                | 8                | T              | 8               | 10                | 11               | 9                 | 8                | 10                 | C              | TTTAAAA                 |

|       |   |    |   |    |   |   |   |   |    |    |    |   |    |   |         |
|-------|---|----|---|----|---|---|---|---|----|----|----|---|----|---|---------|
| HT16L | 5 | 10 | 9 | 11 | 9 | 8 | T | 8 | 10 | 11 | 10 | 8 | 9  | C | TTTAAAA |
| HT16M | 1 | 10 | 9 | 12 | 9 | 8 | T | 8 | 9  | 10 | 11 | 8 | 10 | C | TTTAAAA |
| HT16N | 2 | 10 | 9 | 12 | 9 | 8 | T | 8 | 10 | 10 | 9  | 8 | 11 | C | TTTAAAA |
| HT16O | 1 | 10 | 9 | 12 | 9 | 8 | T | 8 | 10 | 11 | 11 | 9 | 9  | C | TTTAAAA |
| HT16P | 1 | 10 | 9 | 13 | 9 | 8 | T | 8 | 10 | 11 | 10 | 8 | 9  | C | TTTAAAA |

Locus positions, based on aligned sequences, counted from the nucleotide next to the 3' end of the forward primer are in parentheses. For microsatellite loci, their repeat units also are given.

The WCt17 locus was amplified using WCt17 forward and WCt18 reverse primers [14].

*trnL*Fc is in the intergenic spacer region between the *trnL* (UAA) and *trnF* (GAA) genes [16].
