# Supplementary material for: Flowering Time Diversification and Dispersal in Central Eurasian Wild Wheat Aegilops tauschii Coss.: Genealogical and Ecological Framework
Source: PubMed Central journal article supplement (PMC2519791; doi:10.1371/journal.pone.0003138), 2008-09-04

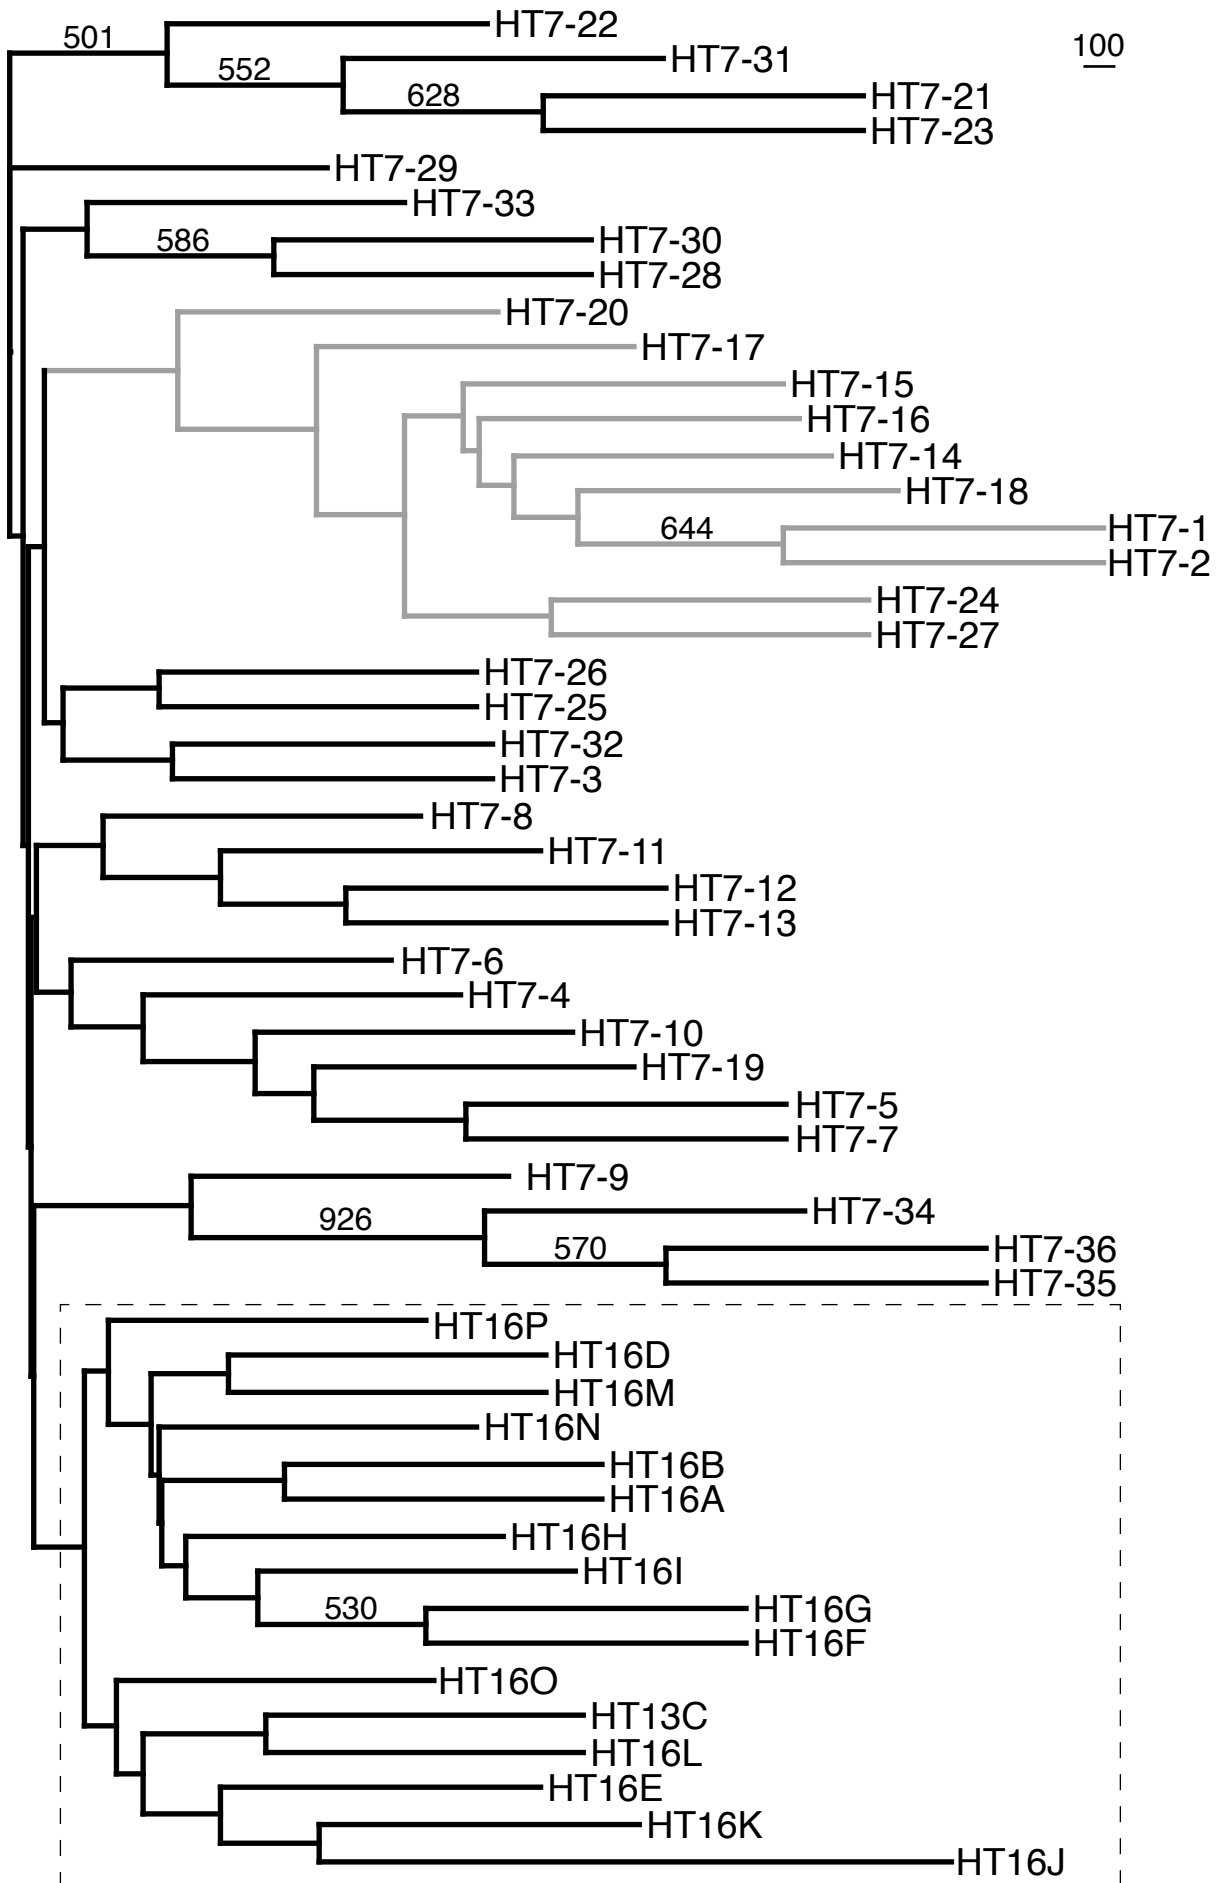

Supplement: pone.0003138.s004.pdf [file pone.0003138.s004.pdf]
